# Supplementary material for: A one-piece lateral flow impedimetric test strip for label-free clenbuterol detection
Source: Royal Society of Chemistry journal article supplement (doi:10.1039/c5ay00706b), 2015-01-01
Supplement: c5ay00706b1.pdf [file c5ay00706b1.pdf]

## Supporting Information

### One-piece Lateral Flow-through Impedimetric Testing Strip for Label-free Detection of Clenbuterol Hydrochloride

Ling Yu,<sup>\*§abc</sup> ZhuanZhuanShi,<sup>§abc</sup> YunLi Tian,<sup>abc</sup> XiaoShuai Wu<sup>abc</sup> and ChangMing Li<sup>abc</sup>

<sup>a</sup>Chongqing Key Laboratory for Advanced Materials and Technologies of Clean Energies, Chongqing 400715, China

<sup>b</sup>Institute for Clean Energy & Advanced Materials, Faculty of Materials and Energy, Southwest University, Chongqing 400715, China

<sup>c</sup>Chongqing Engineering Research Center for Rapid Diagnosis of Dread Disease, Southwest University, Chongqing, 400715, China

\*Corresponding authors: (L. Yu) Tel: +86-23-68254842; E-mail: lingyu12@swu.edu.cn

§ Contribute equally to this work

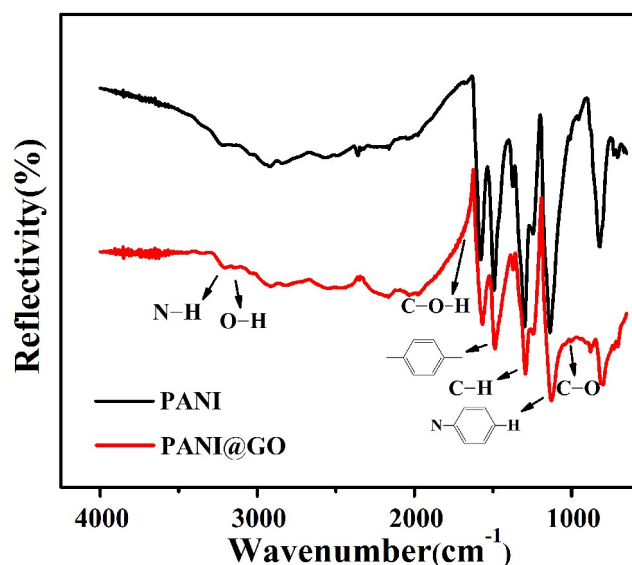

**sFig.1** The FTIR of polyaniline (PANI) and polyaniline-graphene (PANI@GO) nanocomposites

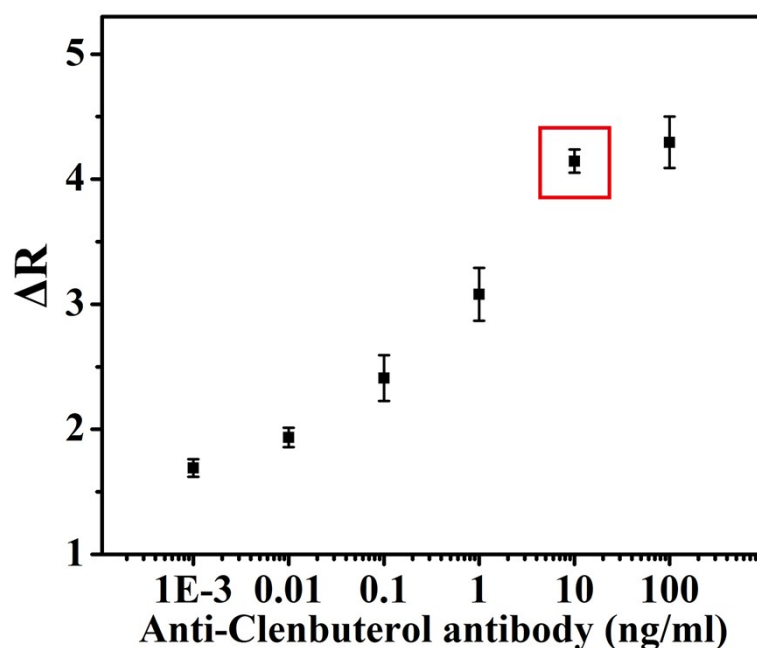

**sFig.2** On-strip direct immunoassay of anti-clenbuterol mAb and OVA-clenbuterol functionalized working electrode (n=3)

**sTable 1 Comparison of PANI-based biosensors**

| Sensing material         | Synthesis method                                                                                                                                                          | Material composition                                                                                                   | Morphology    | Application                  | Label-free device | Disposable | Ref.     |
|--------------------------|---------------------------------------------------------------------------------------------------------------------------------------------------------------------------|------------------------------------------------------------------------------------------------------------------------|---------------|------------------------------|-------------------|------------|----------|
| PANI@GO/ITO              | One-step co-deposition with constant current: 6mA/cm <sup>2</sup> 3min and 3mA/cm <sup>2</sup> 15min                                                                      | 0.3M aniline<br>0.4mg/mL GO<br>1M HClO <sub>4</sub>                                                                    | Nanowires     | Immune sensor                | YES               | YES        | <i>a</i> |
| PANI/Au/PWE              | Seeds growth AuNPs, 20 cycles of CV in a potential range of -0.1-0.8V at scan rate of 50 mV·s <sup>-1</sup>                                                               | 10μL growth aqueous solution, 10μM aniline<br>0.1M H <sub>2</sub> SO <sub>4</sub>                                      | Nanofibers    | Immune sensor                | NO                | YES        | [1]      |
| Concanavalin A /PANI/SWE | Constant potential of 2.0 mV 2min, using glutaraldehyde as a cross linker for immobilizing Concanavalin A                                                                 | Aniline<br>1M H <sub>2</sub> SO <sub>4</sub> ,<br>200μg/mL Concanavalin A                                              |               | Detection of bacterial toxin | NO                | NO         | [2]      |
| HRP/GO@PANI/ITO          | CV in a potential range of 2.0-1.1V at scan rate of 20 mV·s <sup>-1</sup> , using glutaraldehyde as a cross linker for immobilizing HRP                                   | 0.2M aniline<br>50μL GO<br>1M HCl,<br>1mg/mL HRP                                                                       | Porous matrix | Detection of artesunate      | NO                | NO         | [3]      |
| AuNPs/PANI/C S-GS/GCE    | Dropped 5μL CS-GS solution, 6 cycles of CV in a potential range of -0.2-1.0V at scan rate of 50 mV·s <sup>-1</sup> , deposition of AuNPs at potential of -0.2 V for 100 s | CS-GS,<br>0.15 M aniline<br>0.5M H <sub>2</sub> SO <sub>4</sub> ,<br>3 mM HAuCl <sub>4</sub><br>0.1 M KNO <sub>3</sub> |               | DNA sensor                   | NO                | NO         | [4]      |
| PANI/GO/GCE              | Dropped 6μL GO solution, three-step electrochemical deposition: 0.06 mA/cm <sup>2</sup> 0.5h, 0.03 mA/cm <sup>2</sup> 3h, 0.015 mA/cm <sup>2</sup> 3h                     | 2mg/mL GO,<br>0.5 M aniline<br>1M HCl                                                                                  | Nanowires     | DNA sensor                   | NO                | NO         | [5]      |

**a** This work; ITO: indium tin oxide; GCE: glass carbon electrode; SPE: screen printed electrode; EIS: electrical impedance spectroscopy; CV: cyclic voltammetry; DPV: differential pulse voltammetry; LSV: liner sweep voltammetry; GCE: glass carbon electrode; PWE: paper work electrode; SWE: steel work electrode.

#### Reference

1. Li L, Li W, Yang H, Ma C, Yu J, Yan M, et al. Sensitive origami dual-analyte electrochemical immunodevice based on polyaniline/Au-paper electrode and multi-labeled 3D graphene sheets. *Electrochimica Acta*. 2014;120:102-9.
2. da Silva JS, Oliveira MD, de Melo CP, Andrade CA. Impedimetric sensor of bacterial toxins based on mixed (Concanavalin A)/polyaniline films. *Colloids and Surfaces B: Biointerfaces*. 2014;117:549-54.
3. Radhapyari K, Kotoky P, Das MR, Khan R. Graphene–polyaniline nanocomposite based biosensor for detection of antimalarial drug artesunate in pharmaceutical formulation and biological fluids. *Talanta*. 2013;111:47-53.
4. Wang L, Hua E, Liang M, Ma C, Liu Z, Sheng S, et al. Graphene sheets, polyaniline and AuNPs based DNA sensor for electrochemical determination of BCR/ABL fusion gene with functional hairpin probe. *Biosensors and bioelectronics*. 2014;51:201-7.
5. Bo Y, Yang H, Hu Y, Yao T, Huang S. A novel electrochemical DNA biosensor based on graphene and polyaniline nanowires. *Electrochimica Acta*. 2011;56(6):2676-81.
